# Supplementary material for: Moving beyond the Court of Public Opinion: A Citizens’ Jury Exploring the Public’s Values around Funding Decisions for Ultra-Orphan Drugs
Source: MDPI journal article supplement (doi:10.3390/ijerph20010633), 2022-12-30
Supplement: s1 [file s1]

## Supplementary Materials S4

| Table S1. Consolidated criteria for reporting qualitative studies (COREQ) |                                                                       |                                                                                                                                                                                                                                                                                                                                                     |
|---------------------------------------------------------------------------|-----------------------------------------------------------------------|-----------------------------------------------------------------------------------------------------------------------------------------------------------------------------------------------------------------------------------------------------------------------------------------------------------------------------------------------------|
| No.                                                                       | Item                                                                  | Response                                                                                                                                                                                                                                                                                                                                            |
| <b>Domain 1: research team and reflexivity</b>                            |                                                                       |                                                                                                                                                                                                                                                                                                                                                     |
| Personal characteristics                                                  |                                                                       |                                                                                                                                                                                                                                                                                                                                                     |
| 1.                                                                        | Which author/s conducted the Citizens' Jury?                          | AY, DM, JS, and TS facilitated the exercises conducted in the Citizens' Jury (page 4*).                                                                                                                                                                                                                                                             |
| 2.                                                                        | What were the researcher's credentials?                               | AY holds a BSc in biological sciences and an MSc in health policy research.<br>DM holds a PhD in physics and a Masters of Health Services Administration.<br>JS holds a PhD in biochemistry and a Grad. Dip in Primary Health Care, Public Health.<br>TS holds an MSc in epidemiology and a PhD in public health sciences.                          |
| 3.                                                                        | What was their occupation at the time of the study?                   | AY is a Research Associate at the Health Technology and Policy Unit.<br>DM is a professor in the School of Public Health, University of Alberta.<br>JS is a professor in the School of Public Health, University of Adelaide.<br>TS is the Director of the Health Technology and Policy Unit in the School of Public Health, University of Alberta. |
| 4.                                                                        | Was the researcher male or female?                                    | AY, JS, and TS are female. DM is male (page 4).                                                                                                                                                                                                                                                                                                     |
| 5.                                                                        | What experience or training did the researcher have?                  | AY, DM, JS, and TS all have prior experience in facilitating deliberative exercises (page 4).                                                                                                                                                                                                                                                       |
| Relationship with participants                                            |                                                                       |                                                                                                                                                                                                                                                                                                                                                     |
| 6.                                                                        | Was a relationship established prior to study commencement?           | No relationship was established until study recruitment began (page 3).                                                                                                                                                                                                                                                                             |
| 7.                                                                        | What did the participants know about the researcher?                  | The participants were familiar with the interviewers' research interests and reasons for doing the research (page 4).                                                                                                                                                                                                                               |
| 8.                                                                        | What characteristics were reported about the interviewer/facilitator? | The researchers background and potential biases were reported (page 4).                                                                                                                                                                                                                                                                             |
| <b>Domain 2: study design</b>                                             |                                                                       |                                                                                                                                                                                                                                                                                                                                                     |
| Theoretical framework                                                     |                                                                       |                                                                                                                                                                                                                                                                                                                                                     |
| 9.                                                                        | What methodological orientation was stated to underpin the study?     | Pragmatic qualitative research (page 3).                                                                                                                                                                                                                                                                                                            |
| Participant selection                                                     |                                                                       |                                                                                                                                                                                                                                                                                                                                                     |
| 10.                                                                       | How were participants selected?                                       | Through purposive and stratified random sampling (page 3-4).                                                                                                                                                                                                                                                                                        |
| 11.                                                                       | How were participants approached?                                     | Letter mail (page 3-4).                                                                                                                                                                                                                                                                                                                             |
| 12.                                                                       | How many participants were in the study?                              | Sixteen (page 10).                                                                                                                                                                                                                                                                                                                                  |
| 13.                                                                       | How many people refused to participate or dropped out? Reasons?       | None (page 10).                                                                                                                                                                                                                                                                                                                                     |
| Setting                                                                   |                                                                       |                                                                                                                                                                                                                                                                                                                                                     |
| 14.                                                                       | Where was the data collected?                                         | Hotel conference centre in Edmonton, Alberta (page 4-5).                                                                                                                                                                                                                                                                                            |

| <b>Table S1. Consolidated criteria for reporting qualitative studies (COREQ)</b> |                                                                                                           |                                                                                                                                                                                 |
|----------------------------------------------------------------------------------|-----------------------------------------------------------------------------------------------------------|---------------------------------------------------------------------------------------------------------------------------------------------------------------------------------|
| <b>No.</b>                                                                       | <b>Item</b>                                                                                               | <b>Response</b>                                                                                                                                                                 |
| 15.                                                                              | Was anyone else present besides the participants and researchers?                                         | No (page 4-5).                                                                                                                                                                  |
| 16.                                                                              | What are the important characteristics of the sample?                                                     | Sociodemographic profile matching that of Alberta on the following characteristics: gender, age, education, house income, employment status, ethnicity (page 10).               |
| <b>Data collection</b>                                                           |                                                                                                           |                                                                                                                                                                                 |
| 17.                                                                              | Were questions, prompts, guides provided by the authors? Was it pilot tested?                             | Yes. Similar trade-off questions were trialed in previously conducted Citizens' Juries.                                                                                         |
| 18.                                                                              | Were repeat interviews carried out? If yes, how many?                                                     | Not applicable.                                                                                                                                                                 |
| 19.                                                                              | Did the research use audio or visual recording to collect the data?                                       | Yes (page 9).                                                                                                                                                                   |
| 20.                                                                              | Were field notes made during and/or after the Citizens' Jury?                                             | Yes (page 9).                                                                                                                                                                   |
| 21.                                                                              | What was the duration of the Citizens' Jury?                                                              | Two and a half days (page 4).                                                                                                                                                   |
| 22.                                                                              | Was data saturation discussed?                                                                            | Yes.                                                                                                                                                                            |
| 23.                                                                              | Were transcripts returned to participants for comment and/or correction?                                  | No.                                                                                                                                                                             |
| <b>Domain 3: analysis and findings</b>                                           |                                                                                                           |                                                                                                                                                                                 |
| <b>Data analysis</b>                                                             |                                                                                                           |                                                                                                                                                                                 |
| 24.                                                                              | How many data coders coded the data?                                                                      | Two (page 9).                                                                                                                                                                   |
| 25.                                                                              | Did authors provide a description of the coding tree?                                                     | Yes (Appendix C).                                                                                                                                                               |
| 26.                                                                              | Were themes identified in advance or derived from the data?                                               | Both (page 9).                                                                                                                                                                  |
| 27.                                                                              | What software, if applicable, was used to manage the data?                                                | Not applicable.                                                                                                                                                                 |
| 28.                                                                              | Did participants provide feedback on the findings?                                                        | Feedback was obtained through 'report back' sessions during the Jury proceedings and by the facilitators who reviewed their notes with the Jurors after each Exercise (page 8). |
| <b>Reporting</b>                                                                 |                                                                                                           |                                                                                                                                                                                 |
| 29.                                                                              | Were participant quotations presented to illustrate the themes / findings? Was each quotation identified? | Yes (pages 11 – 18).                                                                                                                                                            |
| 30.                                                                              | Was there consistency between the data presented and the findings?                                        | Yes (pages 9 – 19).                                                                                                                                                             |
| 31.                                                                              | Were major themes clearly presented in the findings?                                                      | Yes (pages 9 – 19).                                                                                                                                                             |
| 32.                                                                              | Is there a description of diverse cases or discussion of minor themes?                                    | Yes (pages 9 – 19).                                                                                                                                                             |

\*Note: page # indicates on which page of the manuscript the corresponding item information can be found.
