# Supplementary figures and images for: Moving beyond the Court of Public Opinion: A Citizens’ Jury Exploring the Public’s Values around Funding Decisions for Ultra-Orphan Drugs
Source: MDPI journal article supplement (doi:10.3390/ijerph20010633), 2022-12-30

**Supplementary Materials S3**  
Sample coding tree

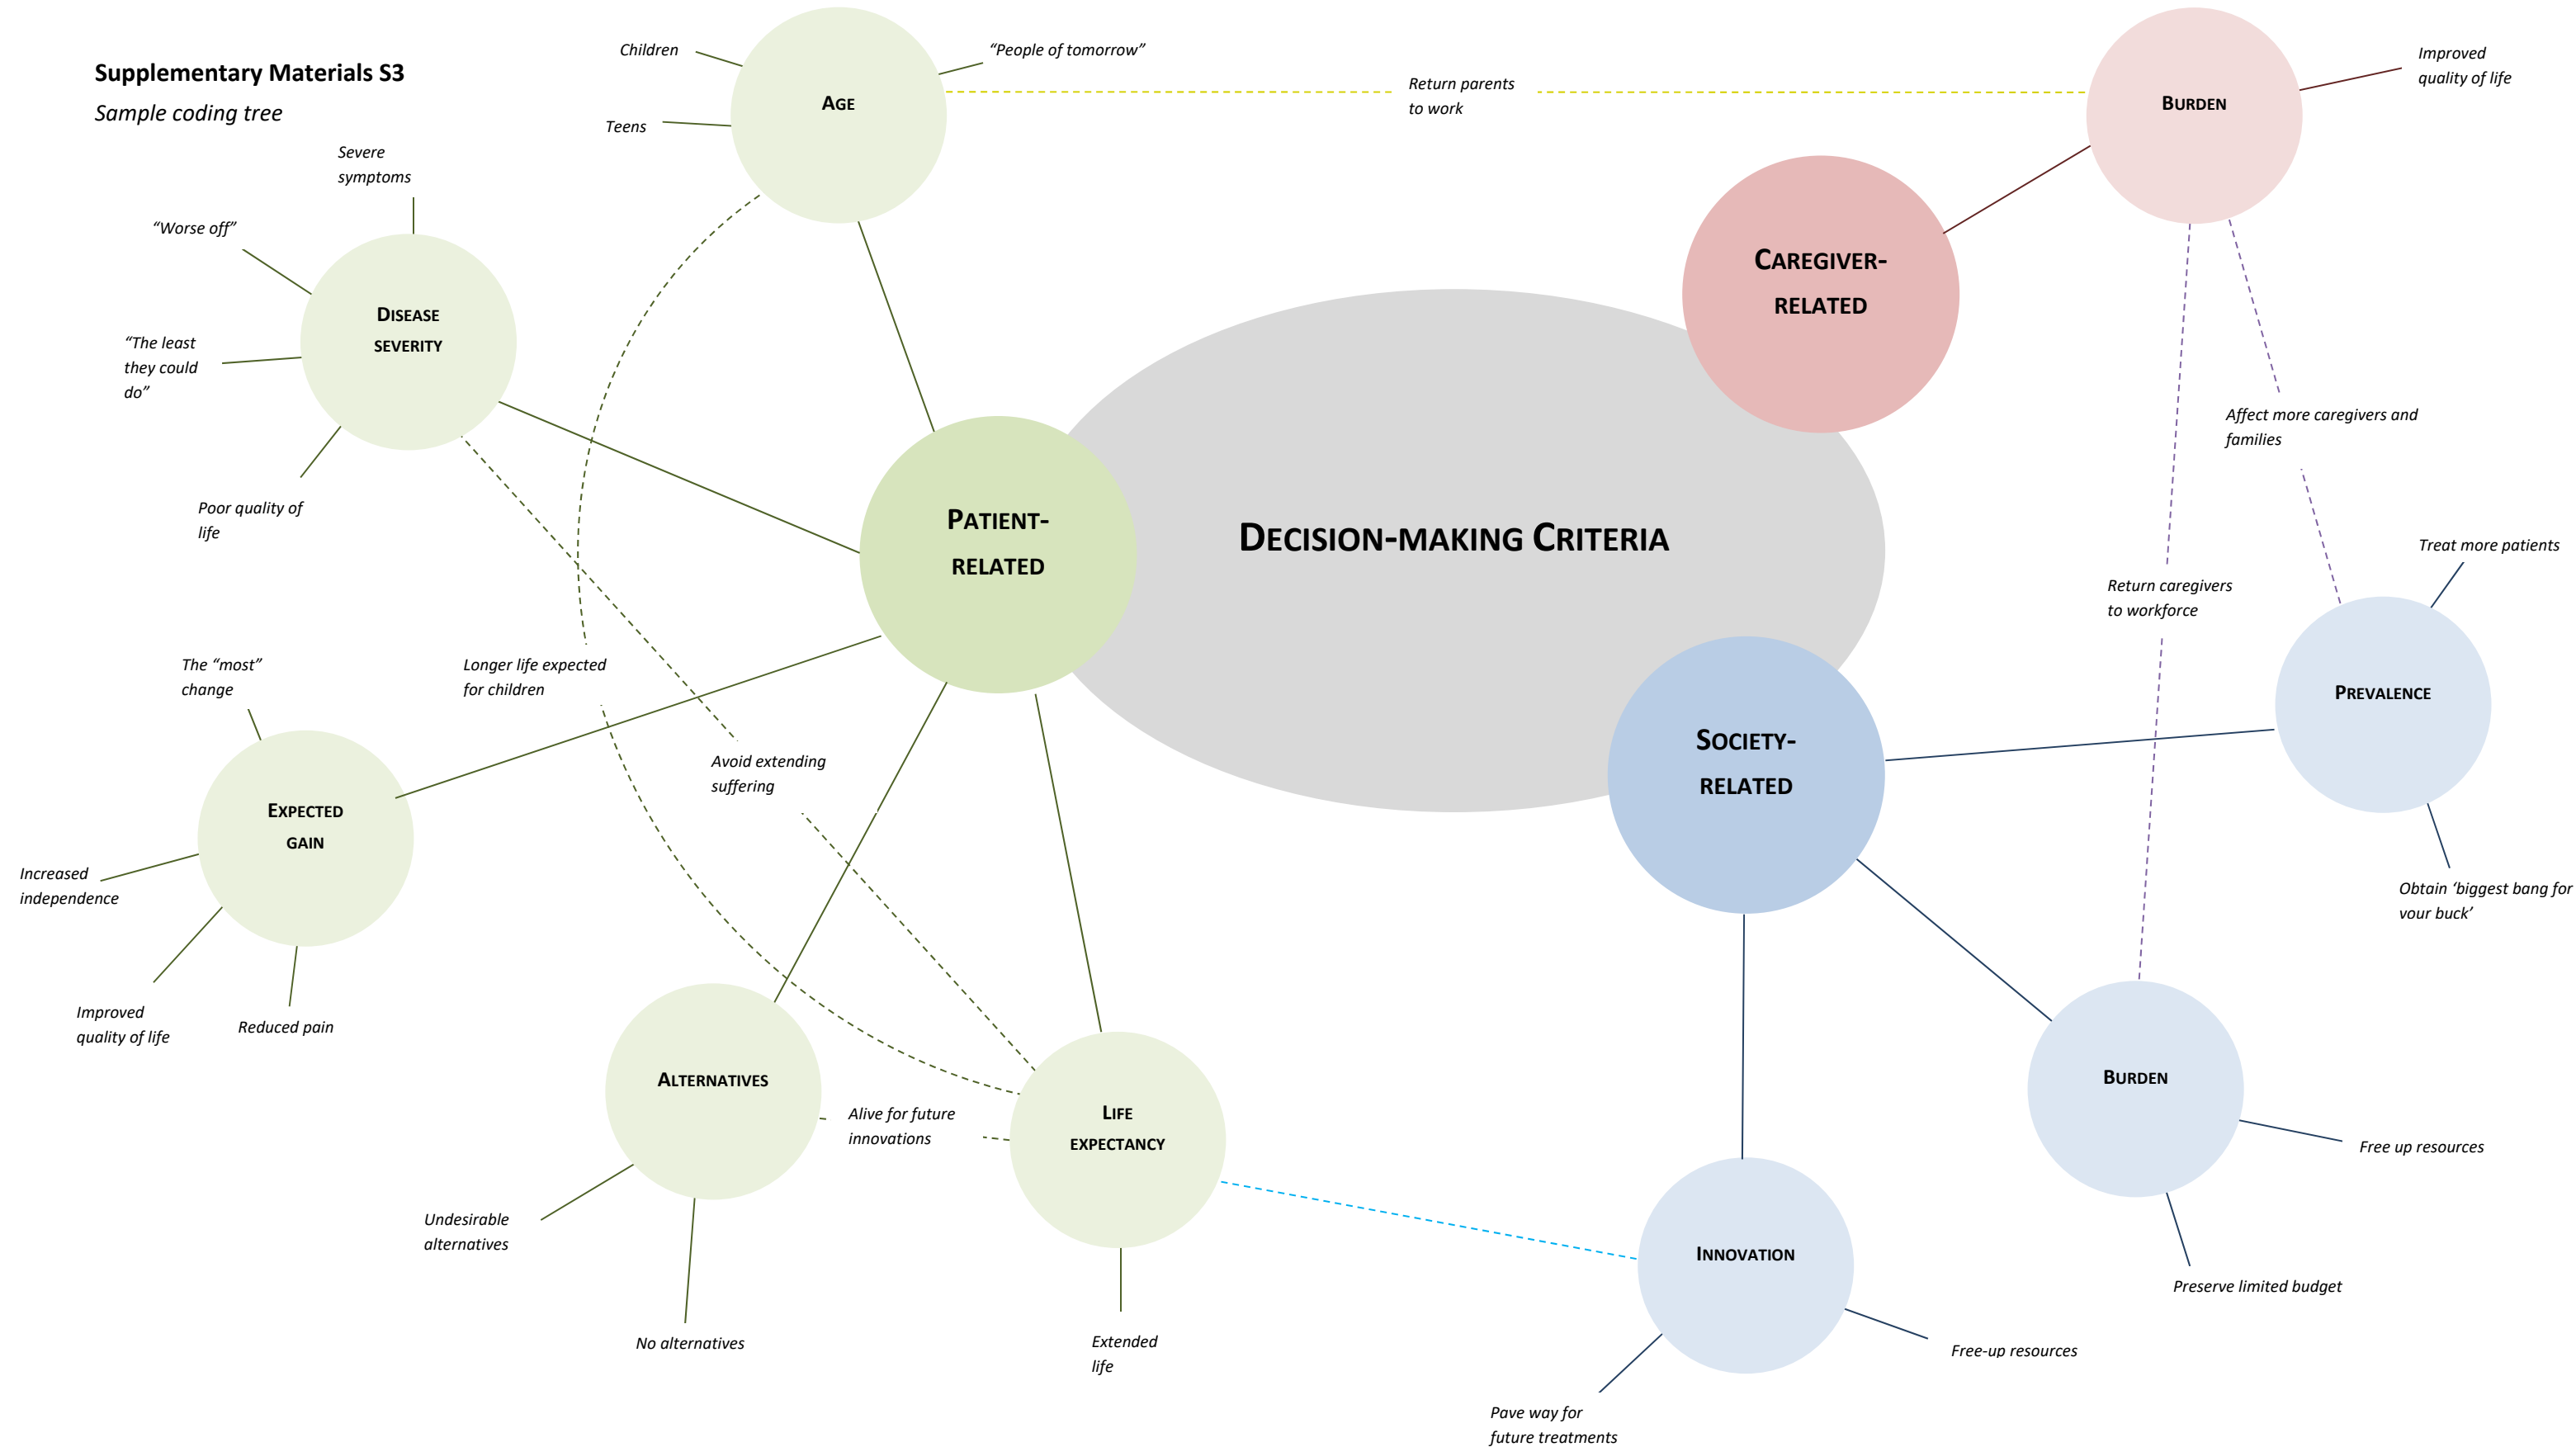

Supplement: s1 [file s1]
